# Supplementary material for: The Effect of the COVID-19 Pandemic on Outpatient Antibiotic Prescription Rates in Children and Adolescents—A Claims-Based Study in Germany
Source: MDPI journal article supplement (doi:10.3390/antibiotics11101433), 2022-10-18
Supplement: s1 [file s1]

## Supplementary Materials

**Table S1.** The size of the total and study population in the age segment 0–14 years and annual prescription rate in Germany in the period 2010 to 2021

| Year                                                                                                                                                                                                                        | Total population <sup>§</sup><br>N | Study population |                                      |
|-----------------------------------------------------------------------------------------------------------------------------------------------------------------------------------------------------------------------------|------------------------------------|------------------|--------------------------------------|
|                                                                                                                                                                                                                             |                                    | N (%)            | Prescription rate per 1,000 children |
| 2010                                                                                                                                                                                                                        | 10,941,201                         | 9,132,132 (83.5) | 731                                  |
| 2011                                                                                                                                                                                                                        | 10,773,006                         | 8,998,191 (83.5) | 671                                  |
| 2012                                                                                                                                                                                                                        | 10,682,903                         | 8,880,007 (83.1) | 617                                  |
| 2013                                                                                                                                                                                                                        | 10,642,432                         | 8,808,031 (82.8) | 623                                  |
| 2014                                                                                                                                                                                                                        | 10,686,723                         | 8,805,108 (82.4) | 559                                  |
| 2015                                                                                                                                                                                                                        | 10,881,126                         | 8,872,685 (81.5) | 509                                  |
| 2016                                                                                                                                                                                                                        | 11,048,568                         | 9,016,718 (81.6) | 516                                  |
| 2017                                                                                                                                                                                                                        | 11,171,759                         | 9,264,105 (82.9) | 455                                  |
| 2018                                                                                                                                                                                                                        | 11,290,815                         | 9,389,190 (83.2) | 428                                  |
| 2019                                                                                                                                                                                                                        | 11,391,259                         | 9,500,009 (83.4) | 401                                  |
| 2020                                                                                                                                                                                                                        | 11,477,800                         | 9,619,883 (83.8) | 227                                  |
| 2021                                                                                                                                                                                                                        | 11,606,935                         | 9,688,483 (83.5) | 188                                  |
| <sup>§</sup> Data for the total number of children and adolescents in the age segment 0–14 years in Germany originate from the Federal Statistical Office ( <a href="https://www.destatis.de">https://www.destatis.de</a> ) |                                    |                  |                                      |

**Table S2.** The size of the total and study population in the age segment 0–14 years and annual prescription rate in 2021 by age group

| Age group in years                                                                                                                                                                                                           | Total population <sup>§</sup> |      | Study population |      |                                      |
|------------------------------------------------------------------------------------------------------------------------------------------------------------------------------------------------------------------------------|-------------------------------|------|------------------|------|--------------------------------------|
|                                                                                                                                                                                                                              | N                             | %    | N                | %    | Prescription rate per 1,000 children |
| 0–1                                                                                                                                                                                                                          | 1,572,049                     | 13.5 | 1,309,696        | 13.5 | 215                                  |
| 2–5                                                                                                                                                                                                                          | 3,219,426                     | 27.7 | 2,702,301        | 27.9 | 319                                  |
| 6–9                                                                                                                                                                                                                          | 3,071,999                     | 26.5 | 2,531,550        | 26.1 | 140                                  |
| 10–14                                                                                                                                                                                                                        | 3,743,461                     | 32.3 | 3,144,936        | 32.5 | 103                                  |
| <sup>§</sup> Data for the total number of children and adolescents in the age segment 0–14 years in Germany originate from the Federal Statistical Office ( <a href="https://www.destatis.de">https://www.destatis.de</a> ). |                               |      |                  |      |                                      |

**Table S3.** Monthly antibiotic prescription rate per 1,000 children aged between 0 and 14 years by antibiotic subgroup in the period 2019 to 2021

| Antibiotic subgroup                           | 2019 |      |      |      |     |     |     |     |     |     |     |      | 2020 |      |      |     |     |     |     |     |     |     |     |     | 2021 |     |     |     |     |     |     |     |     |      |      |     |  |  |
|-----------------------------------------------|------|------|------|------|-----|-----|-----|-----|-----|-----|-----|------|------|------|------|-----|-----|-----|-----|-----|-----|-----|-----|-----|------|-----|-----|-----|-----|-----|-----|-----|-----|------|------|-----|--|--|
|                                               | 1    | 2    | 3    | 4    | 5   | 6   | 7   | 8   | 9   | 10  | 11  | 12   | 1    | 2    | 3    | 4   | 5   | 6   | 7   | 8   | 9   | 10  | 11  | 12  | 1    | 2   | 3   | 4   | 5   | 6   | 7   | 8   | 9   | 10   | 11   | 12  |  |  |
| narrow-spectrum penicillins                   | 7.6  | 8.2  | 8.1  | 7.3  | 7.2 | 5.3 | 4.9 | 3.1 | 4.3 | 4.8 | 6.2 | 7.3  | 7.3  | 7.6  | 5.8  | 1.3 | 1.0 | 1.2 | 1.3 | 1.3 | 1.6 | 1.6 | 1.7 | 1.5 | 0.9  | 0.7 | 1.0 | 0.8 | 0.9 | 1.2 | 1.5 | 1.4 | 2.0 | 2.2  | 2.3  | 2.0 |  |  |
| extended-spectrum penicillins                 | 13.7 | 17.6 | 13.1 | 10.4 | 8.3 | 6.4 | 6.4 | 4.2 | 6.5 | 7.8 | 9.8 | 12.3 | 12.9 | 16.5 | 11.0 | 1.9 | 1.7 | 2.3 | 3.4 | 3.6 | 4.1 | 3.5 | 3.2 | 2.8 | 1.4  | 1.2 | 2.0 | 1.9 | 2.2 | 4.0 | 6.1 | 4.7 | 8.0 | 13.2 | 12.3 | 8.3 |  |  |
| penicillins with $\beta$ -lactamase inhibitor | 1.6  | 2.0  | 1.7  | 1.5  | 1.4 | 1.3 | 1.5 | 1.2 | 1.3 | 1.3 | 1.4 | 1.7  | 1.7  | 2.1  | 1.8  | 0.7 | 0.7 | 0.9 | 1.0 | 1.1 | 1.1 | 0.9 | 0.9 | 0.8 | 0.6  | 0.6 | 0.7 | 0.7 | 0.7 | 1.2 | 1.4 | 1.2 | 1.5 | 1.8  | 1.7  | 1.3 |  |  |
| first-generation cephalosporins               | 0.6  | 0.7  | 0.7  | 0.6  | 0.6 | 0.4 | 0.4 | 0.3 | 0.4 | 0.4 | 0.5 | 0.5  | 0.6  | 0.6  | 0.5  | 0.1 | 0.1 | 0.1 | 0.1 | 0.1 | 0.2 | 0.1 | 0.2 | 0.1 | 0.1  | 0.1 | 0.1 | 0.1 | 0.1 | 0.1 | 0.2 | 0.1 | 0.2 | 0.2  | 0.2  |     |  |  |
| second-generation cephalosporins              | 10.9 | 12.9 | 10.6 | 9.1  | 8.0 | 6.8 | 7.0 | 5.1 | 6.5 | 7.0 | 8.0 | 9.2  | 9.4  | 10.8 | 8.1  | 2.5 | 2.2 | 2.6 | 3.3 | 3.5 | 3.9 | 3.2 | 3.2 | 2.9 | 1.9  | 1.7 | 2.3 | 2.0 | 2.0 | 3.3 | 4.3 | 3.4 | 4.8 | 6.4  | 6.2  | 4.7 |  |  |
| third-generation cephalosporins               | 2.1  | 2.6  | 2.2  | 1.8  | 1.6 | 1.2 | 1.3 | 1.0 | 1.2 | 1.4 | 1.7 | 2.0  | 2.0  | 2.3  | 1.9  | 0.6 | 0.6 | 0.6 | 0.8 | 0.7 | 1.0 | 0.9 | 0.9 | 0.8 | 0.6  | 0.5 | 0.7 | 0.6 | 0.6 | 0.9 | 1.1 | 0.9 | 1.2 | 1.7  | 1.6  | 1.2 |  |  |
| macrolides                                    | 5.0  | 6.3  | 4.5  | 3.6  | 2.9 | 2.2 | 2.2 | 1.6 | 2.7 | 2.9 | 4.1 | 4.5  | 4.6  | 5.5  | 4.0  | 0.8 | 0.5 | 0.6 | 0.9 | 1.0 | 1.6 | 1.2 | 1.1 | 0.9 | 0.5  | 0.4 | 0.7 | 0.6 | 0.6 | 1.1 | 1.8 | 1.2 | 2.2 | 3.3  | 3.0  | 1.9 |  |  |
| sulfonamides/trimethoprim                     | 1.5  | 1.4  | 1.3  | 1.2  | 1.3 | 1.0 | 1.2 | 1.1 | 1.3 | 1.3 | 1.5 | 1.4  | 1.5  | 1.3  | 1.2  | 0.8 | 0.8 | 0.9 | 1.0 | 0.9 | 1.1 | 1.2 | 1.2 | 1.2 | 1.0  | 1.0 | 1.2 | 1.0 | 1.0 | 1.1 | 1.1 | 1.0 | 1.2 | 1.2  | 1.3  | 1.2 |  |  |
| other antibiotics                             | 0.6  | 0.6  | 0.6  | 0.6  | 0.6 | 0.5 | 0.6 | 0.5 | 0.7 | 0.7 | 0.7 | 0.7  | 0.6  | 0.5  | 0.6  | 0.4 | 0.4 | 0.5 | 0.5 | 0.5 | 0.6 | 0.6 | 0.5 | 0.4 | 0.4  | 0.4 | 0.4 | 0.4 | 0.5 | 0.5 | 0.5 | 0.6 | 0.6 | 0.6  | 0.5  |     |  |  |
| See Figure 2 for grafical presentation.       |      |      |      |      |     |     |     |     |     |     |     |      |      |      |      |     |     |     |     |     |     |     |     |     |      |     |     |     |     |     |     |     |     |      |      |     |  |  |
